# Supplementary material
Source: MDPI journal article supplement (https://www.mdpi.com/2073-4352/12/4/458)
Supplement: s1 [file s1]

## **Phase transitions and amorphization of $M_2AgF_4$ ( $M = Na, K, Rb$ ) compounds at high pressure**

Jakub Gawraczyński<sup>1\*</sup>, Łukasz Wolański<sup>1</sup>, Adam Grzelak<sup>1</sup>, Zoran Mazej<sup>2</sup>, Viktor V. Struzhkin<sup>3</sup> and Wojciech Grochala<sup>1</sup>

<sup>1</sup>*Centre of New Technologies, University of Warsaw, Banacha 2C, 02-097, Warsaw, Poland*

<sup>2</sup>*Department of Inorganic Chemistry and Technology, Jožef Stefan Institute, Jamova 39, SI-1000, Ljubljana, Slovenia*

<sup>3</sup>*Center for High Pressure Science and Technology Advanced Research, Shanghai 201203, China*

### **SUPPLEMENTARY MATERIAL**

Structures and crystallographic information files for five computationally studied polymorphs of  $K_2AgF_4$

Color legend: gray = Ag, green = F, purple = K). Green lines indicate presence of Ag-F bonds shorter than or equal to 2.2 Å, whereas yellow lines show Ag-F distances between 2.2 and 2.8 Å. Space groups for unit cells were determined with accuracy of 0.05 Å. The unit cell dimensions and volumes of the high-pressure structures are also given as a percent value of the 0 GPa structures.

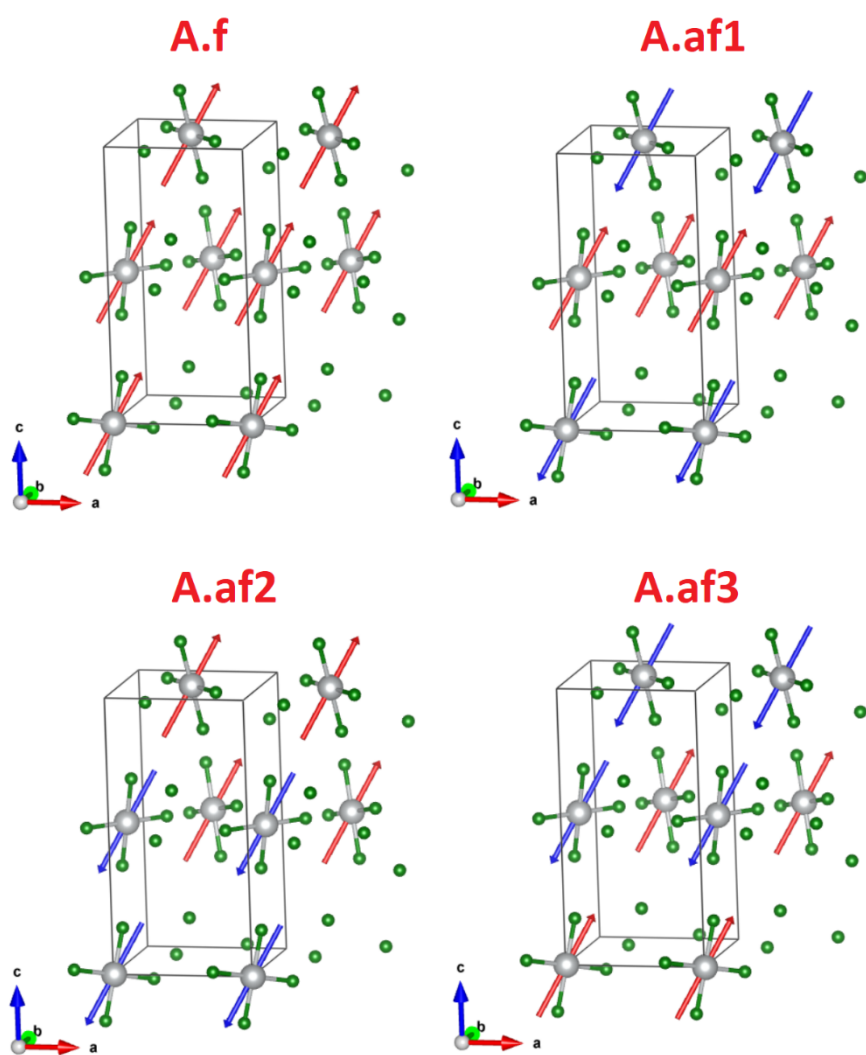

**Figure S1.** Investigated magnetic variants of  $\text{K}_2\text{AgF}_4$  **A** structures: ferromagnetic (**A.f**) and antiferromagnetic ones (**A.af1**, **A.af2** and **A.af3**). Only Ag-F sublattices are shown. Ag-F bonds are indicated for interatomic distances not longer than 2.2 Å. All visualized example structures are for  $p = 0$  GPa.

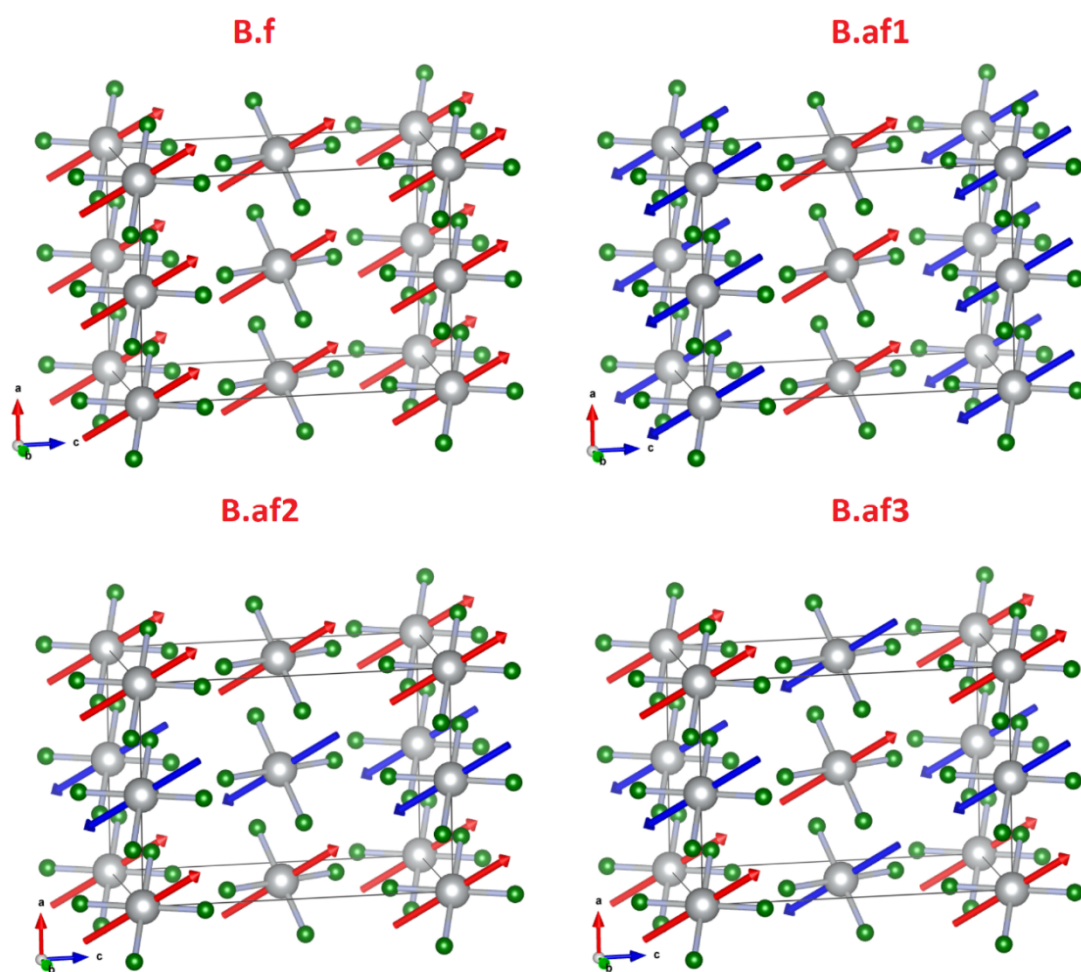

**Figure S2.** Investigated magnetic variants of  $\text{K}_2\text{AgF}_4$  **B** structures: ferromagnetic (**B.f**) and antiferromagnetic ones (**B.af1**, **B.af2** and **B.af3**). Only Ag-F sublattices are shown. Ag-F bonds are indicated for interatomic distances not longer than 2.2 Å. All visualized example structures are for  $p = 0$  GPa.

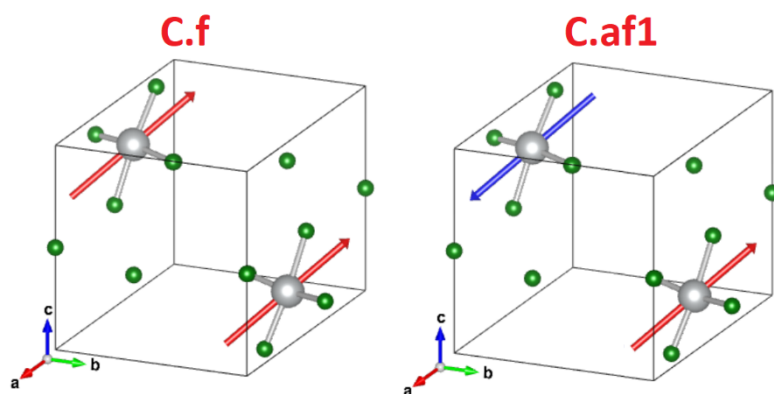

**Figure S3.** Investigated magnetic variants of  $\text{K}_2\text{AgF}_4$  **C** structures: ferromagnetic (**C.f**) and antiferromagnetic one (**C.af1**). Only Ag-F sublattices are shown. Ag-F bonds are indicated for interatomic distances not longer than 2.2 Å. All visualized example structures are for  $p = 0$  GPa.

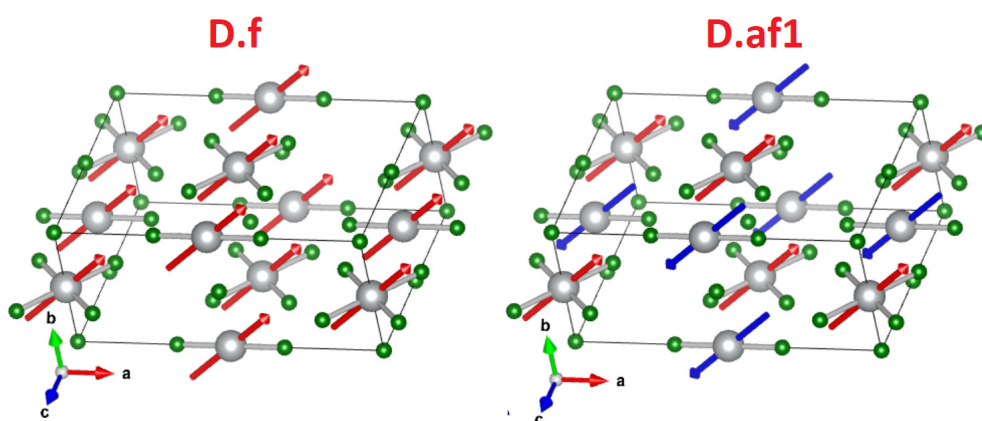

**Figure S4.** Investigated magnetic variants of  $\text{K}_2\text{AgF}_4$  D structures: ferromagnetic (**D.f**) and antiferromagnetic one (**D.af1**). Only Ag-F sublattices are shown. Ag-F bonds are indicated for interatomic distances not longer than 2.2 Å. All visualized example structures are for  $p = 0$  GPa.

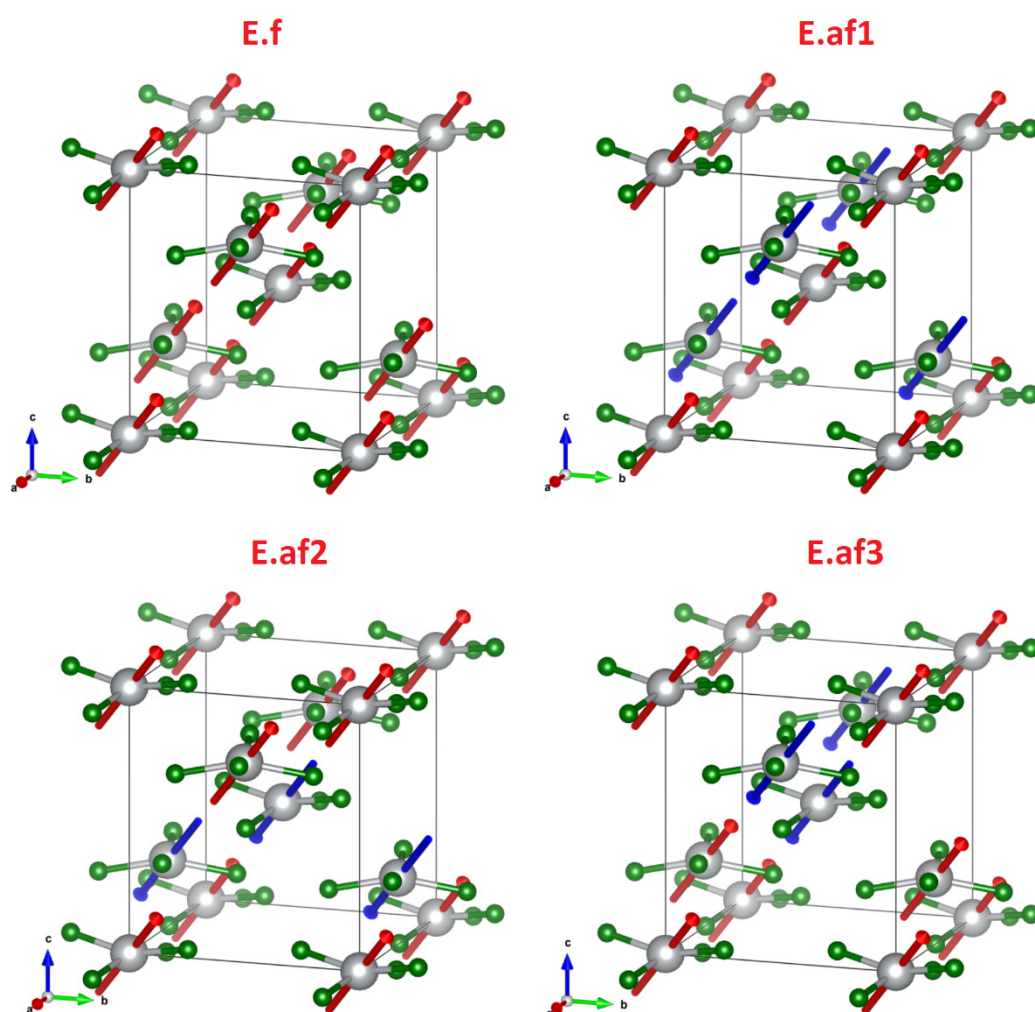

**Figure S5.** Investigated magnetic variants of  $\text{K}_2\text{AgF}_4$  E structures: ferromagnetic (**E.f**) and antiferromagnetic ones (**E.af1**, **E.af2** and **E.af3**). Only Ag-F sublattices are shown. Ag-F bonds are indicated for interatomic distances not longer than 2.2 Å. All visualized example structures are for  $p = 0$  GPa.

## Appendix S1. CIF files of structures discussed in this study.

### Ambient pressure structures.

```
## DFT(PBEsol)+U K2AgF4 A p=0GPa magn.: f
_cell_length_a      6.3315500000
_cell_length_b      6.3277300000
_cell_length_c      12.4819800000
_cell_angle_alpha   90.0000000000
_cell_angle_beta    90.0449600000
_cell_angle_gamma    90.0000000000
_cell_volume        500.0821226682

_symmetry_space_group_name_H-M "P 1 21/c 1"
_symmetry_Int_Tables_number 14
_space_group.reference_setting '014:-P 2ybc'
_space_group.transform_Pp_abc a,b,c;0,0,0

loop_
_space_group_symop_id
_space_group_symop_operation_xyz
1 x,y,z
2 -x,y+1/2,-z+1/2
3 -x,-y,-z
4 x,-y+1/2,z+1/2

loop_
_atom_site_label
_atom_site_type_symbol
_atom_site_symmetry_multiplicity
_atom_site_Wyckoff_label
_atom_site_fract_x
_atom_site_fract_y
_atom_site_fract_z
_atom_site_occupancy
_atom_site_fract_symmform
Ag1 Ag 2 c 0.00000 0.00000 0.50000 1.00000 0,0,0
Ag2 Ag 2 b 0.50000 0.00000 0.00000 1.00000 0,0,0
F1 F 4 e -0.05844 0.44230 0.83675 1.00000 Dx,Dy,Dz
F2 F 4 e 0.44338 0.55660 0.66343 1.00000 Dx,Dy,Dz
F3 F 4 e 0.77059 0.27159 0.03749 1.00000 Dx,Dy,Dz
F4 F 4 e 0.73305 0.73174 0.50023 1.00000 Dx,Dy,Dz
K1 K 4 e -0.02351 0.47737 0.35968 1.00000 Dx,Dy,Dz
K2 K 4 e 0.52284 0.47663 0.86006 1.00000 Dx,Dy,Dz

## DFT(PBEsol)+U K2AgF4 B p=0GPa magn.: af1
_cell_length_a      3.7142100000
_cell_length_b      10.2182100000
_cell_length_c      6.3768200000
_cell_angle_alpha   90.0000000000
_cell_angle_beta    91.8597600000
_cell_angle_gamma    90.0000000000
_cell_volume        241.8892758234

_symmetry_space_group_name_H-M "P 1 21/c 1"
_symmetry_Int_Tables_number 14
_space_group.reference_setting '014:-P 2ybc'
_space_group.transform_Pp_abc a,b,c;0,0,0

loop_
_space_group_symop_id
_space_group_symop_operation_xyz
1 x,y,z
2 -x,y+1/2,-z+1/2
3 -x,-y,-z
4 x,-y+1/2,z+1/2

loop_
```

```

_atom_site_label
_atom_site_type_symbol
_atom_site_symmetry_multiplicity
_atom_site_Wyckoff_label
_atom_site_fract_x
_atom_site_fract_y
_atom_site_fract_z
_atom_site_occupancy
_atom_site_fract_symmform
Ag1 Ag 2 c 0.00000 0.00000 0.50000 1.00000 0,0,0
F1 F 4 e 0.41352 0.44745 0.21908 1.00000 Dx,Dy,Dz
F2 F 4 e 0.01434 0.68835 0.12556 1.00000 Dx,Dy,Dz
K1 K 4 e 0.51872 0.68186 0.41817 1.00000 Dx,Dy,Dz

```

**## DFT(PBEsol)+U K2AgF4 C p=0GPa magn.: af1**

```

_cell_length_a 6.0329400000
_cell_length_b 6.9289208299
_cell_length_c 7.0826800000
_cell_angle_alpha 94.5327116860
_cell_angle_beta 112.7446700000
_cell_angle_gamma 114.0180519600
_cell_volume 469,79.3826835153

_symmetry_space_group_name_H-M "P -1"
_symmetry_Int_Tables_number 2
_space_group.reference_setting '002:-P 1'
_space_group.transform_Pp_abc a,b,c;0,0,0

```

```

loop_
_space_group_symop_id
_space_group_symop_operation_xyz
1 x,y,z
2 -x,-y,-z

```

```

loop_
_atom_site_label
_atom_site_type_symbol
_atom_site_symmetry_multiplicity
_atom_site_Wyckoff_label
_atom_site_fract_x
_atom_site_fract_y
_atom_site_fract_z
_atom_site_occupancy
_atom_site_fract_symmform
Ag1 Ag 2 i 0.41276 0.04242 0.76334 1.00000 Dx,Dy,Dz
F1 F 2 i 0.62817 0.38244 0.81166 1.00000 Dx,Dy,Dz
F2 F 2 i 0.25256 0.06383 -0.01898 1.00000 Dx,Dy,Dz
F3 F 1 f 0.50000 0.00000 0.50000 1.00000 0,0,0
F4 F 1 b 0.00000 0.00000 0.50000 1.00000 0,0,0
F5 F 2 i 0.81729 0.29566 0.32741 1.00000 Dx,Dy,Dz
K1 K 2 i 0.06630 0.34581 0.76360 1.00000 Dx,Dy,Dz
K2 K 2 i 0.24116 0.24408 0.30540 1.00000 Dx,Dy,Dz

```

**## DFT(PBEsol)+U K2AgF4 D p=0GPa magn.: f**

```

_cell_length_a 11.5964698009
_cell_length_b 4.9061300000
_cell_length_c 8.2557867306
_cell_angle_alpha 90.0000000000
_cell_angle_beta 90.0000000000
_cell_angle_gamma 90.0000000000
_cell_volume 469.7029831963

_symmetry_space_group_name_H-M "I 2/m 2/m 2/m"
_symmetry_Int_Tables_number 71
_space_group.reference_setting '071:-I 2 2'
_space_group.transform_Pp_abc a,b,c;0,0,0

```

```

loop_

```

```

_space_group_symop_id
_space_group_symop_operation_xyz
1 x,y,z
2 x,-y,-z
3 -x,y,-z
4 -x,-y,z
5 -x,-y,-z
6 -x,y,z
7 x,-y,z
8 x,y,-z
9 x+1/2,y+1/2,z+1/2
10 x+1/2,-y+1/2,-z+1/2
11 -x+1/2,y+1/2,-z+1/2
12 -x+1/2,-y+1/2,z+1/2
13 -x+1/2,-y+1/2,-z+1/2
14 -x+1/2,y+1/2,z+1/2
15 x+1/2,-y+1/2,z+1/2
16 x+1/2,y+1/2,-z+1/2

loop_
_atom_site_label
_atom_site_type_symbol
_atom_site_symmetry_multiplicity
_atom_site_Wyckoff_label
_atom_site_fract_x
_atom_site_fract_y
_atom_site_fract_z
_atom_site_occupancy
_atom_site_fract_symmform
Ag1 Ag 2 d 0.50000 0.00000 0.50000 1.00000 0,0,0
Ag2 Ag 2 b 0.00000 0.50000 0.50000 1.00000 0,0,0
F1 F 4 e 0.32453 0.00000 0.00000 1.00000 Dx,0,0
F2 F 8 m 0.62431 0.00000 0.68095 1.00000 Dx,0,Dz
F3 F 2 c 0.50000 0.50000 0.00000 1.00000 0,0,0
F4 F 2 a 0.00000 0.00000 0.00000 1.00000 0,0,0
K1 K 8 m 0.15450 0.00000 0.24926 1.00000 Dx,0,Dz

```

**## DFT(PBESol)+U K2AgF4 E p=0GPa magn.: f**

```

_cell_length_a 7.2955650000
_cell_length_b 7.2955650000
_cell_length_c 8.2047100000
_cell_angle_alpha 90.0000000000
_cell_angle_beta 90.0000000000
_cell_angle_gamma 90.0000000000
_cell_volume 436.6978941031

_symmetry_space_group_name_H-M "I -4 2 d"
_symmetry_Int_Tables_number 122
_space_group.reference_setting '122:I -4 2bw'
_space_group.transform_Pp_abc a,b,c;0,0,0

```

```

loop_
_space_group_symop_id
_space_group_symop_operation_xyz
1 x,y,z
2 x,-y+1/2,-z+1/4
3 -x,y+1/2,-z+1/4
4 -x,-y,z
5 y,x+1/2,z+1/4
6 y,-x,-z
7 -y,x,-z
8 -y,-x+1/2,z+1/4
9 x+1/2,y+1/2,z+1/2
10 x+1/2,-y,-z+3/4
11 -x+1/2,y,-z+3/4
12 -x+1/2,-y+1/2,z+1/2
13 y+1/2,x,z+3/4
14 y+1/2,-x+1/2,-z+1/2

```

```

15 -y+1/2,x+1/2,-z+1/2
16 -y+1/2,-x,z+3/4

```

```

loop_
_atom_site_label
_atom_site_type_symbol
_atom_site_symmetry_multiplicity
_atom_site_Wyckoff_label
_atom_site_fract_x
_atom_site_fract_y
_atom_site_fract_z
_atom_site_occupancy
_atom_site_fract_symmform
Ag1 Ag 4 b 0.00000 0.00000 0.50000 1.00000 0,0,0
F1 F 16 e -0.06852 0.27709 0.45335 1.00000 Dx,Dy,Dz
K1 K 8 d 0.88647 0.25000 0.12500 1.00000 Dx,0,0

```

## Relevant elevated pressure structures.

```

## DFT(PBESol)+U K2AgF4 E p=10GPa magn.: f
_cell_length_a 6.9150650000
_cell_length_b 6.9150650000
_cell_length_c 7.6345600000
_cell_angle_alpha 90.0000000000
_cell_angle_beta 90.0000000000
_cell_angle_gamma 90.0000000000
_cell_volume 365.0703364160

_symmetry_space_group_name_H-M "I -4 2 d"
_symmetry_Int_Tables_number 122
_space_group.reference_setting '122:I -4 2bw'
_space_group.transform_Pp_abc a,b,c;0,0,0

```

```

loop_
_space_group_symop_id
_space_group_symop_operation_xyz
1 x,y,z
2 x,-y+1/2,-z+1/4
3 -x,y+1/2,-z+1/4
4 -x,-y,z
5 y,x+1/2,z+1/4
6 y,-x,-z
7 -y,x,-z
8 -y,-x+1/2,z+1/4
9 x+1/2,y+1/2,z+1/2
10 x+1/2,-y,-z+3/4
11 -x+1/2,y,-z+3/4
12 -x+1/2,-y+1/2,z+1/2
13 y+1/2,x,z+3/4
14 y+1/2,-x+1/2,-z+1/2
15 -y+1/2,x+1/2,-z+1/2
16 -y+1/2,-x,z+3/4

```

```

loop_
_atom_site_label
_atom_site_type_symbol
_atom_site_symmetry_multiplicity
_atom_site_Wyckoff_label
_atom_site_fract_x
_atom_site_fract_y
_atom_site_fract_z
_atom_site_occupancy
_atom_site_fract_symmform
Ag1 Ag 4 b 0.00000 0.00000 0.50000 1.00000 0,0,0
F1 F 16 e -0.07345 0.29072 0.45910 1.00000 Dx,Dy,Dz
K1 K 8 d 0.89743 0.25000 0.12500 1.00000 Dx,0,0

```



```

## DFT(PBEsol)+U K2AgF4 C p=60GPa magn.: f
_cell_length_a      4.6368700000
_cell_length_b      5.9522700000
_cell_length_c      5.9543300000
_cell_angle_alpha   113.5047100000
_cell_angle_beta    103.7115500000
_cell_angle_gamma    105.6390100000
_cell_volume        133.6222366842

_symmetry_space_group_name_H-M "P -1"
_symmetry_Int_Tables_number 2
_space_group.reference_setting '002:-P 1'
_space_group.transform_Pp_abc a,b,c;0,0,0

loop_
_space_group_symop_id
_space_group_symop_operation_xyz
1 x,y,z
2 -x,-y,-z

loop_
_atom_site_label
_atom_site_type_symbol
_atom_site_symmetry_multiplicity
_atom_site_Wyckoff_label
_atom_site_fract_x
_atom_site_fract_y
_atom_site_fract_z
_atom_site_occupancy
_atom_site_fract_symmform
Ag1 Ag      2 i -0.05026 0.85790 0.22323 1.00000 Dx,Dy,Dz
F1  F       2 i 0.76638 0.82685 0.85014 1.00000 Dx,Dy,Dz
F2  F       2 i 0.54524 -0.04823 0.30126 1.00000 Dx,Dy,Dz
F3  F       1 c 0.00000 0.50000 0.00000 1.00000 0,0,0
F4  F       1 e 0.50000 0.50000 0.00000 1.00000 0,0,0
F5  F       2 i 0.08766 0.29885 0.53133 1.00000 Dx,Dy,Dz
K1  K       2 i 0.25976 0.75140 0.85265 1.00000 Dx,Dy,Dz
K2  K       2 i 0.62187 0.37185 0.59830 1.00000 Dx,Dy,Dz

```
